# Supplementary material for: Generation, Transfer, and Loss of Alternative Oxidase Paralogues in the Aspergillaceae Family
Source: MDPI journal article supplement (doi:10.3390/jof9121195), 2023-12-14
Supplement: s1 [file s1]

## Supplementary Materials (online)

# Generation, Transfer, and Loss of Alternative Oxidase Paralogues in the *Aspergillaceae* Family

Michel Flipphi <sup>1,†</sup>, Alexandra Márton <sup>1,2,†</sup>, Vivien Bíró <sup>1,2</sup>, Norbert Ág <sup>1</sup>, Erzsébet Sándor <sup>3</sup>, Erzsébet Fekete <sup>1,\*</sup> and Levente Karaffa <sup>1</sup>

- <sup>1</sup> Department of Biochemical Engineering, Faculty of Science and Technology, University of Debrecen, H-4032 Debrecen, Hungary; drir.michelflipphi@gmail.com (M.F.); martonszandi7@gmail.com (A.M.); biro0717@gmail.com (V.B.); agnorbi@gmail.com (N.Á.); levente.karaffa@science.unideb.hu (L.K.)
- <sup>2</sup> Juhász-Nagy Pál Doctoral School of Biology and Environmental Sciences, University of Debrecen, H-4032 Debrecen, Hungary
- <sup>3</sup> Institute of Food Science, Faculty of Agricultural and Food Science and Environmental Management, University of Debrecen, H-4032 Debrecen, Hungary; karaffa@agr.unideb.hu
- \* Correspondence: kicsizsoka@yahoo.com
- † These authors contributed equally to this work.

**Figure S1:** Maximum likelihood (ML) tree of 531 Aox proteins from 351 species of *Eurotiales*, *Onygenales* and *Lecanoromycetes* in circular format and the location of the four paralogous *aoxB* clades.

**Figure S2:** Evidence for a recent horizontal transfer of a series *Flavi*-born AoxB2-2 to the *Trichoderma asperellum* cryptic species complex.

**Table S1:** Oligonucleotide primers used to certify expression of alternative oxidase genes in seven species with multiple *aox* genes.

**Table S2:** Evidence for *aox* gene expression from RNA sequence read archives (SRA) that imply intron excision.

**Table S3:** Patterns of *aoxB* gene loss in *Aspergillus* sections and series.



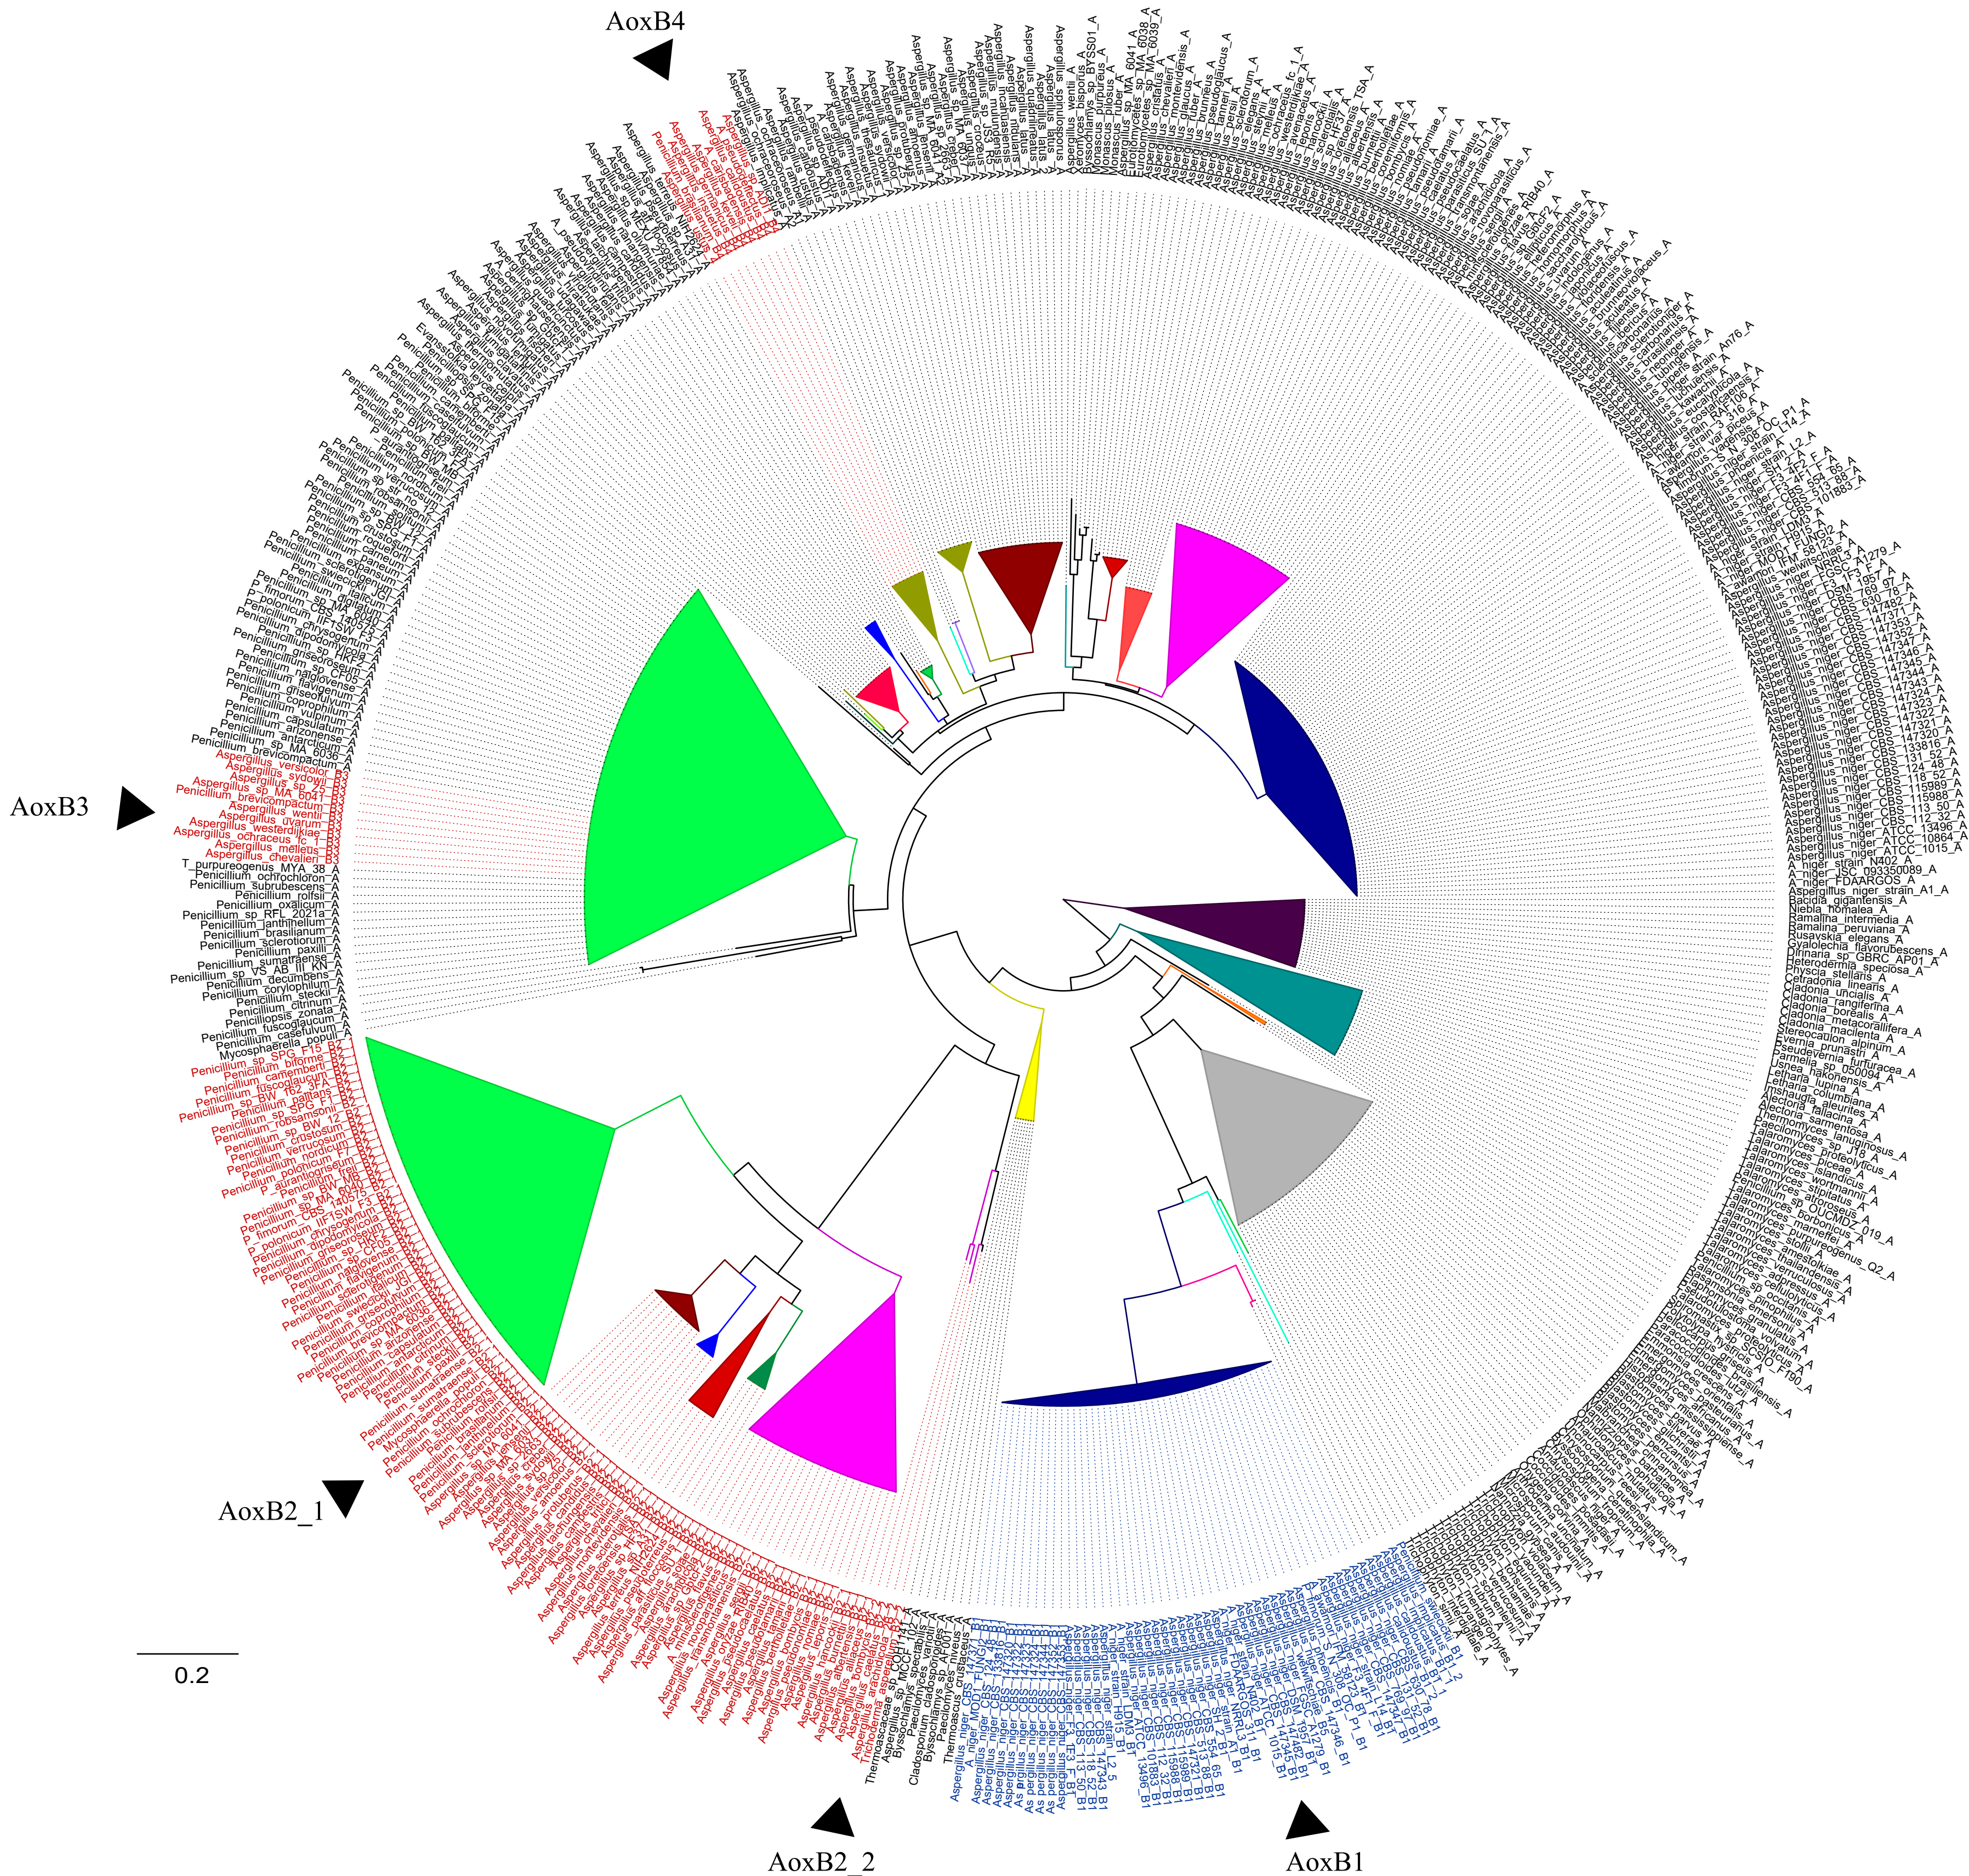

**Figure S1.** Maximum likelihood (ML) tree of 531 Aox proteins from 351 species of *Eurotiales*, *Onygenales* and *Lecanoromycetes* in circular format and the location of the four paralogous *aoxB* clades. The tree contains all Aox proteins identified in the tree taxa: most species have only the ubiquitous AoxA but some species of *Aspergillus* or *Penicillium* feature one or two additional full-length AoxB paralogues. Various taxonomic groups are cartooned for convenience. The clade of 24 *Lecanoromycetes* AoxA (dark purple cartoon) serves as the root of the phylogeny. The cartoons are coloured differently for the following taxa: blue green: *Trichocomaceae* family; orange: *Elaphomycetaceae* family; light grey: *Onygenales* order; yellow: *Thermoascaceae* family; light green: *Penicillium* genus (two clades); red: section *Fumigati*; blue: section *Candidi* (two clades); darker green: section *Terrei* (two clades); violet: section *Ochraceorisei*; olive green: section *Usti* (two clades); auburn: section *Nidulantes* including series *Versicolores*; turquoise: *A. wentii* representing section *Cremeri*; crimson: section *Aspergillus* (two clades); tomato red: section *Circumdati* (two clades); magenta: section *Flavi* (two clades); dark blue: section *Nigri* including the *Aspergillus niger sensu stricto* complex (two clades). In the periphery all 531 protein names have been printed. Black letters are used for AoxA proteins; red letters mean paralogous AoxB; blue lettered are the *Aspergillus niger sensu lato* taxa with intact AoxB1. Outside the periphery, the four clades of paralogous proteins are named (anti clockwise) AoxB1, AoxB2-1 or AoxB2-2 for the vanishing satellite clade, AoxB3 and AoxB4, for the reader's convenience. The scattered existence of the rare duplication AoxB1 in four diverged taxa of *Aspergillaceae* was previously described.



a

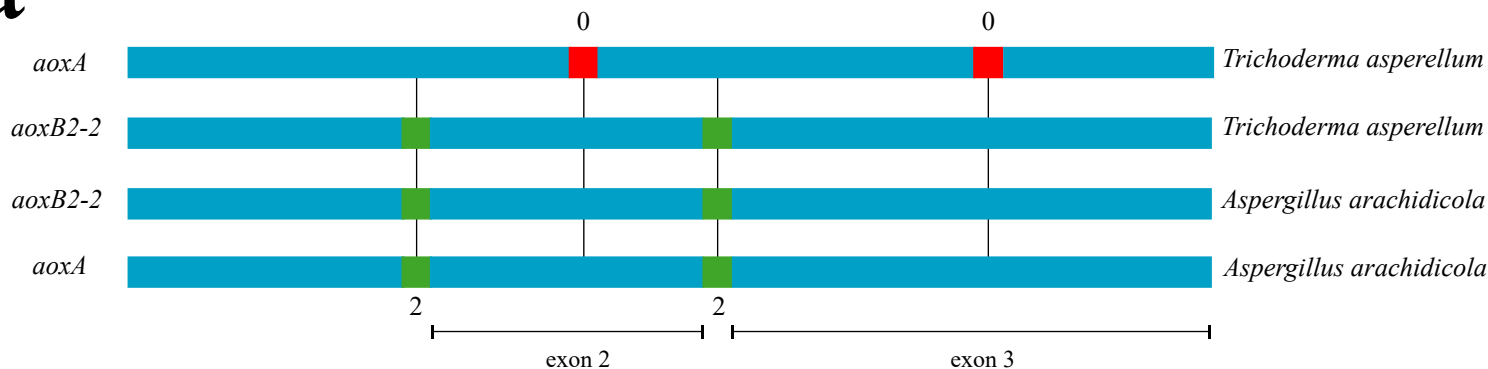

b

| Similarity (ID %)           | <i>A.arachidicola</i> _A | <i>T.asperellum</i> _B2-2 |
|-----------------------------|--------------------------|---------------------------|
| <i>A.arachidicola</i> _B2-2 | 71.8                     | 93.28                     |

A YTEECMRHVTVAHRETCKDMDADVALGIVRLLRWGMDFVTGYHPHPPGK--EHEAKFQMTCKWLTRFVLESVAGVPGMVGMLRHLRSLRMRKRDNGWIETLLEEAYNRMHLLTFLKLAEPPGWFMRMLVGA  
 B2-2 YSDQOVRAITLSHRDVKDWDTKVALNSVRLLRWGMDFATGYKHPTEEQARNDPHKVMTEEQNLTRFIFLESVAGVPGMVGMLRHLRSLRMRKRDNGWIETLLEEAAHNERMHLTFLKLAKPGWLMRLMVIGA  
 HGT B2-2 YSDKQVCAITLSHRDVKDWDTKVALNSVRLLRWGMDFATGYKHPTEEQARKHPHKFVMTEEKWLTRFIFLESVAGVPGMVGMLRHLRSLRMRKRDNGWIETLLEEAAHNERMHLTFLKLAKPGWFMRLMVIGA

A QGVFFNGFFISYLISPRICHRFVGYLEEEAVTYTRAIQDLHGKLPKWKLEAPEIAVCYWKMPGQRMDLLVYVRADEAKHREVNHTLGNLNOAADPNPMSVYKTPSKAHPGKGMANKATGWEREVI  
 B2-2 QGVFFNGFFIAYLISPRICHRFVGYLEEEAVTYTRAIQDLEKGLSKWQTLQSPETAIKYWKMPGGRSMRDLLYVRADEAKHREVNHTFGNLVPEEDPNPFAGRCNLNTSKLQPSKGLTNLKPIGWERKDVL  
 HGT B2-2 QGVFFNGFFLAYLISPRICHRFVGYLEEEAVTYTRAIQDLEHGKLPKWKTLQSPETAIKYWKMPGGRSMRDLLYVRADEAKHREVNHTFGNLVPEEDPNPFAGRYSNTSKLQPSKGLMNLKPIGWERKDVL

c

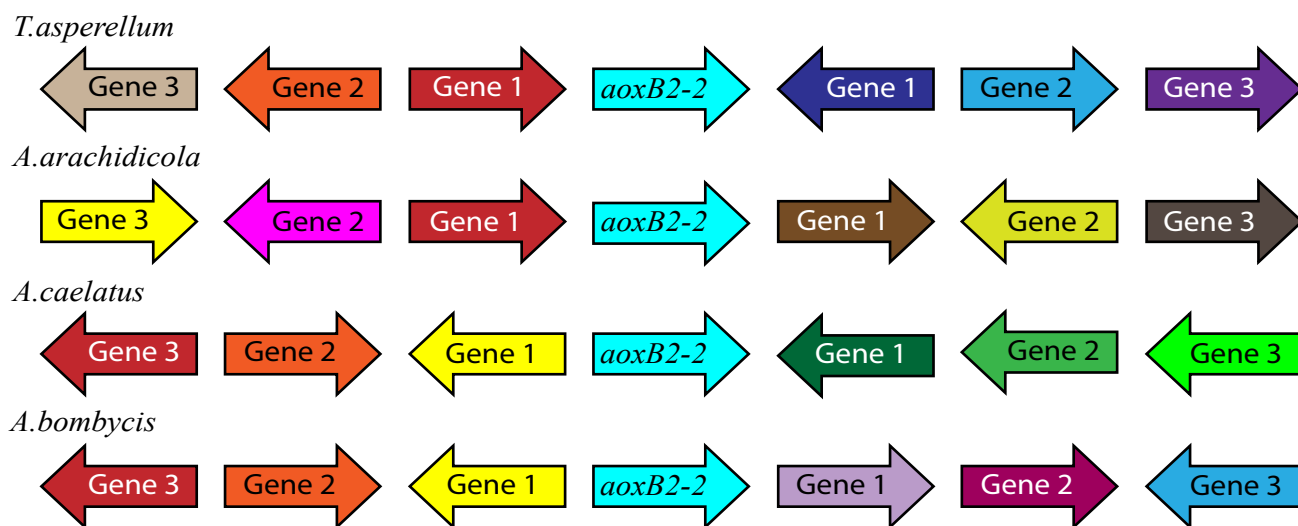

**Figure S2.** Evidence for a recent horizontal transfer of a series *Flavi*-born AoxB2-2 to the *Trichoderma asperellum* cryptic species complex. (a) Schematic alignment of the gene models of the *A. arachidicola* *aoxA* and *aoxB2-2* with those of the *T. asperellum* *aoxA* and *aoxB2-2* genes. The transferred gene has the two phase-two introns (green) typical to *Eurotiales* and *Onygenales* *aox* genes. The *aoxA* gene from *T. asperellum* has two phase-zero introns (red) at completely different positions; (b) Triple sequence alignment of the C-terminal 266 amino acids of AoxA and the C-terminal 268 amino acids AoxB2-2 from *A. arachidicola* and AoxB2-2 from *T. asperellum*. The aligned peptides start with the conserved tyrosine [Y] encoded by first full codon in exon-2. Identical amino acids are shaded in black background; (c) The contemporary environment of the AoxB2-2 paralogue locus in *A. bombycis* (aka *A. luteovirescens*), *A. caelatus*, *A. arachidicola* and *T. asperellum*. The orientation and deduced function description of the product of the neighbouring genes were collected from the JGI genome browsers. The *aoxB2-2* paralogue gene in the centre is represented by the light grey arrows. The different colors represent different predicted functions for the neighbouring gene. For the sake of clarity, the differently colored arrows are all equal in size and thus do not represent the real size of the coding regions of the neighbouring genes.

**Supplementary Table S1.** Oligonucleotide primers used to certify expression of alternative oxidase genes in seven species with multiple *aox* genes.

| Species                                          | Primer                     | Sequence (5'-)           |
|--------------------------------------------------|----------------------------|--------------------------|
| <i>Aspergillus terreus</i><br>NIH2624_A          | Aterreus-aoxA-Fw           | CCTCATTCAACGTTTCATCGA    |
|                                                  | Aterreus-aoxA-Rv           | CTCAAAGGTACCTGGTCCCA     |
|                                                  | Aterreus-aoxA-Bridge-Rv    | CCAGTAGCGTTTCGATCCAT     |
| <i>Aspergillus terreus</i><br>NIH2624_B2-1       | Aterreus-aoxB2-1-Fw        | CTAAAGAGTGGACCGCTCT      |
|                                                  | Aterreus-aoxB2-1-Rv        | ATGTAGGGCATTACAGACA      |
|                                                  | Aterreus-aoxB1-1-Bridge-Rv | GAGGAGGGTTTCGATCCA       |
| <i>Aspergillus oryzae</i><br>RIB40_A             | Aoryzae-aoxA-Fw            | GTAGCTTCCCAATGTCCAGT     |
|                                                  | Aoryzae-aoxA-Rv            | CACAGTCCATAATGTGGATGAC   |
| <i>Aspergillus oryzae</i><br>RIB40_B2-1          | Aoryzae-aoxB2-1-Fw         | GTACTCTTTCTCATCTGTCAG    |
|                                                  | Aoryzae-aoxB2-1-Rv         | AGAGGCAGAATTCTAGACCAA    |
|                                                  | Aoryzae-aoxB2-1-Bridge-Rv  | CCAGGAGTGTCTCAATCCA      |
| <i>Penicillium rubens</i><br>NRRL1951_A          | Prubens-aoxA-Fw            | CTCTCTGTCATTGGTTCCATC    |
|                                                  | Prubens-aoxA-Rv            | GAGATGCTATTCAAATGACCAA   |
|                                                  | Prubens-aoxA-Bridge-Rv     | TCGAGCAGGGTTTCAATCCA     |
| <i>Penicillium rubens</i><br>NRRL1951_B2-1       | Prubens-aoxB2-1-Fw         | CCTTGTCGAAGTCTCAAGAC     |
|                                                  | Prubens-aoxB2-1-Rv         | GATAGACCAGTTGAGGTCAA     |
|                                                  | Prubens-aoxB2-1-Bridge-Rv  | TCGAGGAGGGTTTCTATCCAT    |
| <i>Aspergillus wentii</i><br>DTO 134E9_A         | Awentii-aoxA-Fw            | TCATCCATACGCATCAACCA     |
|                                                  | Awentii-aoxA-Rv            | CACGACGACAATGAGAAGGA     |
|                                                  | Awentii-aoxA-Bridge-Rv     | CTTCCAAAAGGGTTTCGATCCA   |
| <i>Aspergillus wentii</i><br>DTO 134E9_B3        | Awentii-aoxB3-Fw           | CAGTATCAACTATTAAGCGACTA  |
|                                                  | Awentii-aoxB3-Rv           | CTGACATATATCCGTGGTCCG    |
|                                                  | Awentii-aoxB3-Bridge-Rv    | CTAACTGTGTTTCAATCCAGC    |
| <i>Aspergillus calidoustus</i><br>SF006504_A     | Acalido-aoxA-Fw            | CAGTACAACACTACGATCCA     |
|                                                  | Acalido-aoxA-Rv            | CCATAGCCTTTATCGTGTCA     |
|                                                  | Acalido-aoxA-Bridge-Rv     | CCAACAACGTTTCAATCCA      |
| <i>Aspergillus calidoustus</i><br>SF006504_B1    | Acalido-aoxB1-Fw           | TGTTTGTGCTAGCAACTTCCA    |
|                                                  | Acalido-aoxB1-Rv           | GGTAACTCCATATGAAAGTCC    |
|                                                  | Acalido-aoxB1-Bridge-Rv    | CAATCAGCGATTCAATCCAT     |
| <i>Aspergillus calidoustus</i><br>SF006504_B4    | Acalido-aoxB4-Fw           | CTTCTCGAATTCGGTCCAT      |
|                                                  | Acalido-aoxB4-Rv           | TGTACACAACACCTCCAAC      |
|                                                  | Acalido-aoxB4-Bridge-Rv    | CCAAAAGCGTTTCGATCCA      |
| <i>Aspergillus sydowii</i><br>CBS 593.65_A       | Asydowii-aoxA-Fw           | CGATACATCCAATATCCAACCT   |
|                                                  | Asydowii-aoxA-Rv           | CGTCTTGACCAGTGAATG       |
|                                                  | Asydowii-aoxA-Bridge-Rv    | TCCAGCAAGGTCTCGATCCAT    |
| <i>Aspergillus sydowii</i><br>CBS 593.65_B2-1    | Asydowii-aoxB2-1-Fw        | GGTACAACCTCACAGTCAAG     |
|                                                  | Asydowii-aoxB2-1-Rv        | CAGGTCATCAAGCGTCTAC      |
|                                                  | Asydowii-aoxB2-1-Bridge    | CAAGTAGTGTTTCAATCCA      |
| <i>Aspergillus sydowii</i><br>CBS 593.65_B3      | Asydowii-aoxB3-Fw          | CGTTACTTGTTTGTATAGACATC  |
|                                                  | Asydowii-aoxB3-Rv          | CTCAAGAAATAGAACTATCGCAA  |
|                                                  | Asydowii-aoxB3-Bridge      | CGAGGAGCGTTTCTATCCA      |
| <i>Trichoderma asperellum</i><br>CBS 433.97_A    | Tasperellum-aoxA-Fw        | CCACAGCTATATTAGCTTTCAC   |
|                                                  | Tasperellum-aoxA-Rv        | ACACAACCTTCGTTTCTTGAGTCT |
| <i>Trichoderma asperellum</i><br>CBS 433.97_B2-2 | Tasperellum-aoxB2-2-Fw     | GGATTGACATTAATAGCCAG     |
|                                                  | Tasperellum-aoxB2-2-Rv     | CACCTTGATAAAACGGTACA     |
|                                                  | Tasperellum-aoxB2-2-Bridge | CTAGCAGTGTCTCGATCCA      |

**Supplementary Table S2.** Evidence for *aox* gene expression from RNA sequence read archives (SRA) that imply intron excision.

| species / gene / intron no.  | exon fusion | NCBI SRA database | SRA read covering exon fusion | Species / gene / intron no. | exon fusion | NCBI SRA database | SRA read covering exon fusion                |
|------------------------------|-------------|-------------------|-------------------------------|-----------------------------|-------------|-------------------|----------------------------------------------|
| <b><i>A. calidoustus</i></b> |             |                   |                               | <b><i>A. terreus</i></b>    |             |                   |                                              |
| <i>aoxA</i><br>intron 1      | CCAGTTTAT   | ERX631988         | ERR677097.21482935.1          | <i>aoxA</i><br>intron 1     | CCTGTCTAT   | SRX7896641        | SRR11291067.6645117.1                        |
| intron 2                     | GGATGGATT   | ERX631988         | ERR677097.21338014.1          | intron 2                    | GGATGGATC   | SRX7896641        | SRR11291067.4382190.1                        |
| intron 3                     | CCTTCCTCAA  | ERX631988         | ERR677097.21534348.1          | <i>aoxB2-1</i><br>intron 1  | CCAGTGATC   | SRX7896641        | SRR11291067.4577324.1                        |
| <i>aoxB1</i><br>intron 1     | CCAATCTAC   | ERX631988         | ERR677097.19174082.1          | intron 2                    | GGCTGGATC   | SRX7896641        | SRR11291067.6484527.1                        |
| intron 2                     | GGATGGATT   | ERX631988         | ERR677097.383320.1            | <b><i>A. wentii</i></b>     |             |                   |                                              |
| <i>aoxB4</i><br>intron 1     | CCGGTGTAC   | ERX631988         | ERR677097.4402296.2           | <i>aoxA</i><br>intron 1     | CCTGTTTAC   | Aspwe1 [JGI]      | No excision detected<br>Locus2300v1rpkm79.34 |
| intron 2                     | GGCTGGATC   | ERX631988         | ERR677097.11324119.1          | intron 2                    | GGATGGATC   | Aspwe1 [JGI]      | Locus5976v1rpkm17.33<br>[EST contig]         |
| <b><i>A. oryzae</i></b>      |             |                   |                               | <i>aoxB2-1</i><br>intron 1  | CCAGTATAC   | Aspwe1 [JGI]      | Locus8961v1rpkm3.92<br>[EST contig]          |
| <i>aoxA*</i><br>intron 1     | CCTGTTTAT   | DRX169184         | DRR178658.23709178.1          | intron 2                    | GGCTGGATT   | Aspwe1 [JGI]      | Locus8961v1rpkm3.92<br>[EST contig]          |
| <i>aoxB2-1</i><br>intron 1   | CCTGTATAC   | DRX169184         | DRR178658.3184879.2           | <b><i>P. rubens</i></b>     |             |                   |                                              |
| intron 2                     | GGATGGATT   | DRX169184         | DRR178658.21178077.1          | <i>aoxA</i><br>intron 1     | CCAGTATAC   | SRX7124595        | SRR10428551.21351875.1                       |
| <b><i>A. sydowii</i></b>     |             |                   |                               | intron 2                    | GGATGGATT   | SRX7124595        | SRR10428551.1426888.1                        |
| <i>aoxA</i><br>intron 1      | CCTGTCTAT   | SRX13745574       | SRR17576387.22532111.1        | <i>aoxB2-1</i><br>intron 1  | CCCGTATAC   | SRX7124595        | SRR10428551.4681329.1                        |
| intron 2                     | GGATGGATC   | SRX13745574       | SRR17576387.22175180.1        | intron 2                    | GGATGGATA   | SRX7124595        | SRR10428551.20234005.1                       |
| <i>aoxB2-1</i><br>intron 1   | CCAGTATAC   | SRX13745574       | SRR17576387.21790899.1        | <b><i>T. asperellum</i></b> |             |                   |                                              |
| intron 2                     | GGATGGATT   | SRX13745574       | SRR17576387.19454217.1        | <i>aoxA</i><br>intron 1     | AATGCCTTGT  | SRX19144862       | SRR23195941.7227219.2                        |
| <i>aoxB3</i><br>intron 1     | CCAGTATAC   | SRX13745574       | SRR17576387.22181706.1        | intron 2                    | TTCAATACTG  | SRX19144862       | SRR23195941.2092837.1                        |
| intron 2                     | GGGTGGATA   | SRX13745574       | SRR17576387.22515080.1        | <i>aoxB2-2</i><br>intron 1  | CCGGTGTAC   | SRX19144862       | SRR23195941.7589312.2                        |
|                              |             |                   |                               | intron 2                    | GGTTGGATC   | SRX19144862       | SRR23195941.13228317.1                       |

**Footnote:** Extant NCBI-lodged RNA SRAs are recorded that cover the predicted exon-exon fusions in alternative oxidase transcripts in the seven species listed in Table 1. Only one SRA is recorded for each intron excision. For *Aspergillus wentii* there are no RNA SRAs; instead, appropriate EST contigs from JGI were collected and listed. \* The second intron in *aoxA* (ubiquitous gene) is absent from all genome-sequenced section *Flavi* species.

Supplementary Table S3. Patterns of *aoxB* gene loss in *Aspergillus* sections and series.

| Species                                            | Section     | Series                 | <i>aoxA</i> | <i>aoxB1</i> | <i>aoxB2-1</i> | <i>aoxB2-2</i> | <i>aoxB3</i> | <i>aoxB4</i> |
|----------------------------------------------------|-------------|------------------------|-------------|--------------|----------------|----------------|--------------|--------------|
| <i>A. bombycis</i><br>( <i>A. luteovirescens</i> ) | Flavi       | <i>Nomiarum</i>        | X           |              | X              | X              |              |              |
| <i>A. nomiae</i>                                   |             | <i>Nomiarum</i>        | X           |              | X              |                |              |              |
| <i>A. caelatus</i>                                 |             | <i>Kitamyces</i>       | X           |              | X              | X              |              |              |
| <i>A. tamaritii</i>                                |             | <i>Kitamyces</i>       | X           |              | X              |                |              |              |
| <i>A. arachidicola</i>                             |             | <i>Flavi</i>           | X           |              | X              | X              |              |              |
| <i>A. parasiticus</i>                              |             | <i>Flavi</i>           | X           |              | X              |                |              |              |
| <i>A. flavus</i>                                   |             | <i>Flavi</i>           | X           |              | X              |                |              |              |
| <i>A. leporis</i>                                  |             | <i>Leporum</i>         | X           |              | X              |                |              |              |
| <i>A. hancockii</i>                                |             | <i>Leporum</i>         | X           |              | X              |                |              |              |
| <i>A. alliaceus</i>                                |             | <i>Alliacei</i>        | X           |              | X              |                |              |              |
| <i>A. bertholletiae</i>                            |             | <i>Bertholletiarum</i> | X           |              | X              |                |              |              |
| <i>A. calidoustus</i>                              | Usti        | <i>Calidousti</i>      | X           | X            |                |                |              | X            |
| <i>A. pseudodeflectus</i>                          |             |                        | X           |              |                |                |              | X            |
| <i>A. germanicus</i>                               |             |                        | X           |              |                |                |              | X            |
| <i>A. keveii</i>                                   |             |                        | X           |              |                |                |              | X            |
| <i>A. insuetus</i>                                 |             |                        | X           |              |                |                |              | X            |
| <i>A. carlsbadensis</i>                            |             |                        | X           |              |                |                |              | X            |
| <i>A. ustus</i>                                    |             | <i>Usti</i>            | X           |              |                |                |              | X            |
| <i>A. chevalieri</i>                               | Aspergillus | <i>Chevalierorum</i>   | X           |              | X              |                | X            |              |
| <i>A. montevidensis</i>                            |             |                        | X           |              | X              |                |              |              |
| <i>A. intermedius</i>                              |             |                        | X           |              | X              |                |              |              |
| <i>A. caperatus</i>                                |             |                        | X           |              | X              |                |              |              |
| <i>A. cibarius</i>                                 |             | <i>Aspergillus</i>     | X           |              | X              |                |              |              |
| <i>A. glaucus</i>                                  |             | <i>Aspergillus</i>     | X           |              |                |                |              |              |
| <i>A. cumulatus</i>                                |             | <i>Rubri</i>           | X           |              | X              |                | X            |              |
| <i>A. ruber</i>                                    |             | <i>Rubri</i>           | X           |              |                |                |              |              |
| <i>A. xerophilus</i>                               |             | <i>Xerophili</i>       | X           |              | X              |                |              |              |
| <i>A. punctus</i>                                  | NA          | NA                     | X           |              | X              |                |              |              |
| <i>A. penicilloides</i>                            | Restricti   | <i>Penicilliioides</i> | X           |              | X              |                |              |              |
| <i>A. implicatus</i>                               | Sparsi      | <i>Implicati</i>       | X           | XX           |                |                |              |              |
| <i>Aspergillus</i> sp. MA 6041                     | NA          | NA                     | X           |              | X              |                | X            |              |
| <i>A. sydowii</i>                                  | Nidulantes  | <i>Versicolores</i>    | X           |              | X              |                | X            |              |
| <i>A. creber</i>                                   |             |                        | X           |              | X              |                |              |              |
| <i>A. teennsseensis</i>                            |             |                        | X           |              | X              |                |              |              |
| <i>A. jensenii</i>                                 |             |                        | X           |              | X              |                |              |              |
| <i>A. austroafricanus</i>                          |             |                        | X           |              | X              |                |              |              |
| <i>A. amoeneus</i>                                 |             |                        | X           |              | X              |                |              |              |
| <i>A. protuberus</i>                               |             |                        | X           |              | X              |                |              |              |
| <i>A. versicolor</i>                               |             |                        | X           |              | X              |                |              |              |

|                                |                   |               |   |   |   |  |   |   |
|--------------------------------|-------------------|---------------|---|---|---|--|---|---|
| <i>A. subversicolor</i>        |                   |               | X |   | X |  |   |   |
| <i>A. angustatus</i>           |                   | Stellati      | X |   | X |  | X |   |
| <i>A. wentii</i>               |                   |               | X |   |   |  | X |   |
| <i>A. sepultus</i>             |                   | Wentiorum     | X |   |   |  | X |   |
| <i>A. dimorphicus</i>          |                   |               | X |   |   |  | X |   |
| <i>A. arxii</i>                |                   | Arxiorum      | X |   |   |  | X |   |
| <i>A. inflatus</i>             |                   | Inflati       | X |   |   |  | X |   |
| <i>A. insolitus</i>            | Polypaecilum      | Polypaecilum  | X |   | X |  |   |   |
| <i>A. hortai</i>               |                   |               | X |   | X |  |   |   |
| <i>A. pseudoterreus</i>        |                   |               | X |   | X |  |   |   |
| <i>A. terreus</i>              |                   | Terrei        | X |   | X |  |   |   |
| <i>A. alabamensis</i>          |                   |               | X |   | X |  |   |   |
| <i>A. floccosus</i>            |                   |               | X |   | X |  |   |   |
| <i>A. auroterreus</i>          |                   |               | X |   | X |  |   |   |
| <i>A. ambiguus</i>             |                   | Ambigui       | X |   | X |  |   |   |
| <i>A. candidus</i>             |                   |               | X |   | X |  |   |   |
| <i>A. campestris</i>           |                   |               | X |   | X |  |   |   |
| <i>A. taichungensis</i>        |                   | Candidi       | X |   | X |  |   |   |
| <i>A. subalbidus</i>           |                   |               | X |   | X |  |   |   |
| <i>A. tritici (A. tritici)</i> |                   |               | X |   | X |  |   |   |
| <i>A. westerdijkiae</i>        |                   |               | X |   |   |  | X |   |
| <i>A. ochraceus</i>            |                   |               | X |   |   |  | X |   |
| <i>A. melleus</i>              |                   |               | X |   |   |  | X |   |
| <i>A. ostianus</i>             |                   | Circumdati    | X |   |   |  | X |   |
| <i>A. sesamicola</i>           |                   |               | X |   |   |  | X |   |
| <i>A. westlandensis</i>        |                   |               | X |   |   |  | X |   |
| <i>A. subauricomus</i>         |                   |               | X |   |   |  | X |   |
| <i>A. petrakii</i>             | NA                | NA            | X |   |   |  | X |   |
| <i>A. neoaricomus</i>          | NA                | NA            | X |   |   |  | X |   |
| <i>A. uvarum</i>               | Nigri             | Japonici      | X |   | X |  |   |   |
| <i>P. brevicompactum</i>       | Brevicompacta     | Brevicompacta | X |   | X |  | X |   |
| <i>P. brasilianum</i>          | Lavata-Divaricata | Simplicissima | X |   | X |  |   | X |
| <i>P. swiecickii</i>           | Ramosum           | Lanosa        | X | X | X |  |   |   |

\*NA. Fungal isolate not analyzed and categorized by Houbraken and co-workers [32].

**Footnote:** Species from the *Aspergillus* whole-genus sequencing project (JGI Proposal ID: 1307; written with red letters in the left column) were assessed on the basis of their assignment to sections and/or series – according to Houbraken and co-workers – in which species with two or three *aox* genes (written with black letters in the left column) were earlier identified. In the six columns at the right, the presence of *aox* genes was indicated by the crosses [X]: for convenience, these indicators for the independent *aox* duplication events are in different colors – black (*aoxA*), turquoise (*B1*), green (*B2-1*), violet (*B2-2*), yellow (*B3*) and magenta (*B4*), respectively – and further highlighted by the yellow- or black background.
